# Supplementary material
Source: PubMed Central journal article supplement (PMC6987004)
Supplement: NIHMS1050713-supplement-Supplemental_Materials.pdf [file NIHMS1050713-supplement-Supplemental_Materials.pdf]

**Supplementary Table 1***All Regression Models with Trail Making Test Part A (n = 320)*

|                                         | <u>Model 1</u> | <u>Model 2</u> | <u>Model 3</u>   |
|-----------------------------------------|----------------|----------------|------------------|
| Age                                     | 0.004 ***      | 0.004 ***      | <b>0.004 ***</b> |
| Sex                                     | 0.04           | 0.04           | <b>0.04 **</b>   |
| Education                               | 0.04           | 0.03           | <b>0.03</b>      |
| Telomere length                         | 0.03           | 0.03           | <b>-0.004</b>    |
| Poverty status                          | 0.35           | 0.31           | <b>0.05 *</b>    |
| Race                                    | 0.18           | 0.13           | <b>0.09 ***</b>  |
| Telomere Length x Poverty Status        | -0.06          | -0.05          |                  |
| Telomere Length x Race                  | -0.02          | -0.01          |                  |
| Poverty Status x Race                   | -0.06          | 0.03           |                  |
| Telomere Length x Poverty Status x Race | 0.02           |                |                  |

*Note.* Unstandardized regression coefficients (*b*) across three model iterations.

Model 3 (shown in **bold** above) was retained as the final regression model, \*  $p < .05$ , \*\*  $p < .01$ , \*\*\*  $p < .001$

**Supplementary Table 2***All Regression Models with the Brief Test of Attention (n = 273)*

---

|                                         | <u>Model 1</u> | <u>Model 2</u> | <u>Model 3</u>  |
|-----------------------------------------|----------------|----------------|-----------------|
| Age                                     | -0.05 *        | -0.05 *        | <b>-0.05 **</b> |
| Sex                                     | -0.16          | -0.17          | <b>-0.16</b>    |
| Education                               | -0.56          | -0.57          | <b>-0.54</b>    |
| Telomere length                         | -0.18          | 0.20           | <b>0.34</b>     |
| Poverty status                          | -5.06          | -3.05          | <b>-0.08</b>    |
| Race                                    | -2.88          | -0.66          | <b>-0.40</b>    |
| Telomere Length x Poverty Status        | 0.89           | 0.54           |                 |
| Telomere Length x Race                  | 0.44           | 0.05           |                 |
| Poverty Status x Race                   | 3.91           | -0.11          |                 |
| Telomere Length x Poverty Status x Race | -0.72          |                |                 |

---

*Note.* Unstandardized regression coefficients (*b*) across three model iterations.

Model 3 (shown in **bold** above) was retained as the final regression model, \*  $p < .05$ , \*\*  $p < .01$ , \*\*\*  $p < .001$

**Supplementary Table 3***All Regression Models with Semantic Verbal Fluency (n = 320)*

|                                         | <u>Model 1</u> | <u>Model 2</u> | <u>Model 3</u>  |
|-----------------------------------------|----------------|----------------|-----------------|
| Age                                     | -0.08 *        | -0.09 *        | <b>0.09 *</b>   |
| Sex                                     | 0.11           | 0.08           | <b>0.20</b>     |
| Education                               | -2.32 **       | -2.34 **       | <b>-2.32 **</b> |
| Telomere length                         | -1.88 *        | -1.49          | <b>-0.03</b>    |
| Poverty status                          | -13.52         | -9.66          | <b>-0.62</b>    |
| Race                                    | -12.89         | -8.69          | <b>-1.54 *</b>  |
| Telomere Length x Poverty Status        | 2.24           | 1.56           |                 |
| Telomere Length x Race                  | 1.96           | 1.22           |                 |
| Poverty Status x Race                   | 8.04           | 0.43           |                 |
| Telomere Length x Poverty Status x Race | -1.35          |                |                 |

*Note.* Unstandardized regression coefficients (*b*) across three model iterations.

Model 3 (shown in **bold** above) was retained as the final regression model, \*  $p < .05$ , \*\*  $p < .01$ , \*\*\*  $p < .001$

**Supplementary Table 4***All Regression Models with CVLT Total Learning Trials (n = 303)*

|                                         | <u>Model 1</u> | <u>Model 2</u> | <u>Model 3</u>   |
|-----------------------------------------|----------------|----------------|------------------|
| Age                                     | -0.08 *        | -0.10 *        | <b>-0.10 *</b>   |
| Sex                                     | -2.38 **       | -2.36 **       | <b>-2.35 **</b>  |
| Education                               | -4.60 ***      | -4.56 ***      | <b>-4.57 ***</b> |
| Telomere length                         | 0.27           | -0.85          | <b>-0.30 ***</b> |
| Poverty status                          | -1.02          | -6.52          | <b>-0.24</b>     |
| Race                                    | 2.93           | -3.26          | <b>-3.47 ***</b> |
| Telomere Length x Poverty Status        | -0.09          | 1.06           |                  |
| Telomere Length x Race                  | -1.19          | -0.10          |                  |
| Poverty Status x Race                   | -10.42         | 1.50           |                  |
| Telomere Length x Poverty Status x Race | 1.95           |                |                  |

*Note.* Unstandardized regression coefficients (*b*) across three model iterations.

Model 3 (shown in **bold** above) was retained as the final regression model, \*  $p < .05$ , \*\*  $p < .01$ , \*\*\*  $p < .001$

**Supplementary Table 5***All Regression Models with CVLT Short-Delay Free Recall (n = 274)*

---

|                                         | <u>Model 1</u> | <u>Model 2</u> | <u>Model 3</u>   |
|-----------------------------------------|----------------|----------------|------------------|
| Age                                     | -0.08 ***      | -0.08 ***      | <b>-0.08</b> *** |
| Sex                                     | -0.99 **       | -0.98 **       | <b>-1.00</b> **  |
| Education                               | -1.74 ***      | -1.73 ***      | <b>-1.74</b> *** |
| Telomere length                         | 0.03           | -0.18          | <b>-0.08</b>     |
| Poverty status                          | -0.03          | -1.99          | <b>-0.05</b>     |
| Race                                    | 2.08           | -0.52          | <b>-1.64</b> *** |
| Telomere Length x Poverty Status        | -0.02          | 0.32           |                  |
| Telomere Length x Race                  | -0.69          | -0.23          |                  |
| Poverty Status x Race                   | -4.27          | 0.26           |                  |
| Telomere Length x Poverty Status x Race | 0.81           |                |                  |

---

*Note.* Unstandardized regression coefficients (*b*) across three model iterations.

Model 3 (shown in **bold** above) was retained as the final regression model, \*  $p < .05$ , \*\*  $p < .01$ , \*\*\*  $p < .001$

**Supplementary Table 6***All Regression Models with CVLT Long-Delay Free Recall (n = 273)*

---

|                                         | <u>Model 1</u> | <u>Model 2</u> | <u>Model 3</u>   |
|-----------------------------------------|----------------|----------------|------------------|
| Age                                     | -0.05 **       | -0.05 *        | <b>-0.05 *</b>   |
| Sex                                     | -0.85 **       | -0.82 *        | <b>-0.86 *</b>   |
| Education                               | -1.70 **       | -1.66 ***      | <b>-1.66 *</b>   |
| Telomere length                         | 0.24           | 0.28           | <b>0.01</b>      |
| Poverty status                          | -0.82          | -3.95          | <b>0.30</b>      |
| Race                                    | 6.18           | -0.001         | <b>-1.76 ***</b> |
| Telomere Length x Poverty Status        | -0.10          | 0.74           |                  |
| Telomere Length x Race                  | -1.43          | -0.34          |                  |
| Poverty Status x Race                   | -10.66         | 0.20           |                  |
| Telomere Length x Poverty Status x Race | 1.93           |                |                  |

---

*Note.* Unstandardized regression coefficients (*b*) across three model iterations.

Model 3 (shown in **bold** above) was retained as the final regression model, \*  $p < .05$ , \*\*  $p < .01$ , \*\*\*  $p < .001$
